# Supplementary material for: Photo-gain optimization in multilayer organic phototransistors by study of space-charge limited current
Source: Royal Society of Chemistry journal article supplement (doi:10.1039/d4tc01925c), 2024-01-01
Supplement: d4tc01925c1.pdf [file d4tc01925c1.pdf]

## Supporting Information

### Photo-gain optimization in multilayer organic phototransistors by study of space-charge limited current

Giulia Baroni<sup>1</sup>, Francesco Reginato<sup>1</sup>, Mario Prosa<sup>1</sup>, Marco Brucale<sup>1</sup>, Federico Prescimone<sup>1</sup>, Mirko Seri, Katherine Gallegos-Rosas<sup>2</sup>, Caterina Soldano<sup>2</sup>, Margherita Bolognesi<sup>1</sup>, \*, Stefano Toffanin<sup>1</sup>, \*

<sup>1</sup> Consiglio Nazionale delle Ricerche (CNR) Istituto per lo Studio dei Materiali Nanostrutturati (ISMN), 40129 Bologna (Italy)

<sup>2</sup> Department of Electronics and Nanoengineering, Aalto University, 00250 Espoo (Finland)

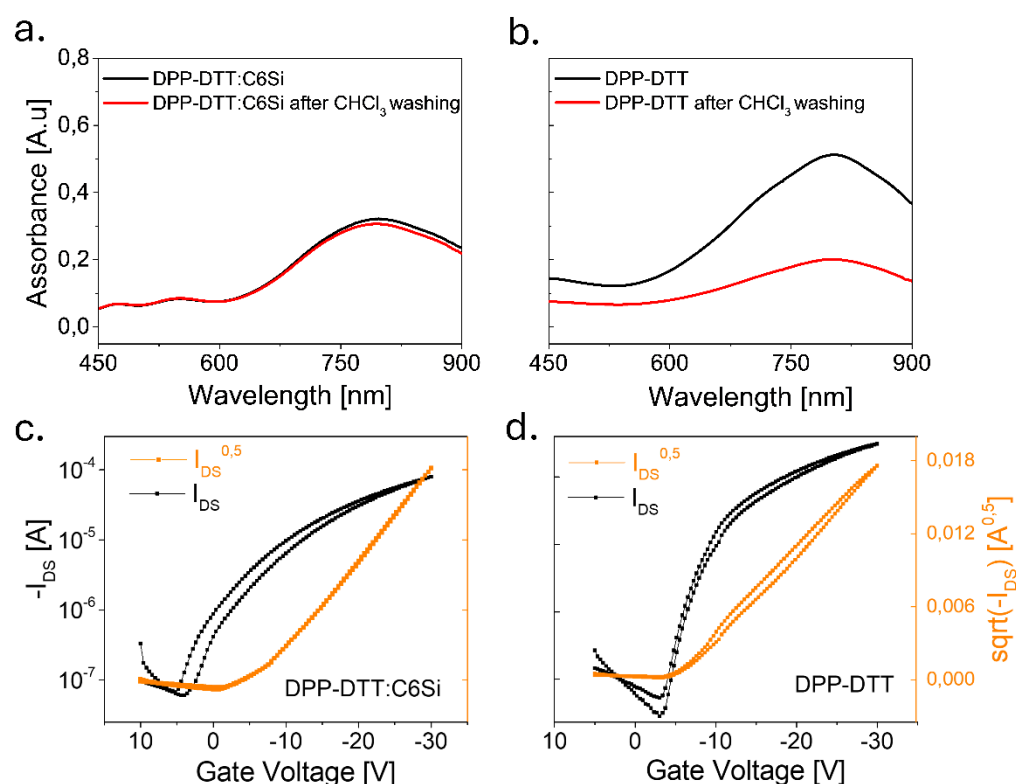

**Figure S1.** Cross-linked DPP-DTT:C6Si characterization: (a-b) The absorption spectra of the two different HTL after CHCl<sub>3</sub> washing (c-d) Transfer characteristics of transistors with different HTL ( $V_{DS} = -30$  V), including, (c) cross-linked DPP-DTT:C6Si film, (d) pristine DPP-DTT film.

|              | $\mu_p^{\text{FET}}$<br>[cm <sup>2</sup> /(V s)] | V <sub>th</sub><br>[V] | I <sub>d</sub> /I <sub>g</sub><br>@V <sub>g</sub> =-30V | I <sub>on</sub> /I <sub>off</sub> |
|--------------|--------------------------------------------------|------------------------|---------------------------------------------------------|-----------------------------------|
| DPP-DTT      | 10 <sup>-1</sup>                                 | -4                     | 10 <sup>3</sup>                                         | 10 <sup>3</sup>                   |
| DPP-DTT:C6Si | 10 <sup>-2</sup>                                 | -7                     | 10 <sup>3</sup>                                         | 10 <sup>3</sup>                   |

**Table S1:** Performance parameters of the OFETs fabricated with pristine DPP-DTT and DPP-DTT crosslinked by C6Si. Each value has been extrapolated from transfer curve measured in dark conditions.

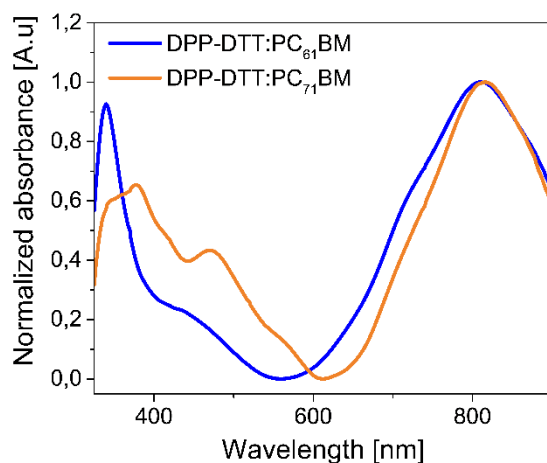

**Figure S2.** Normalized absorption spectra of the BHJs.

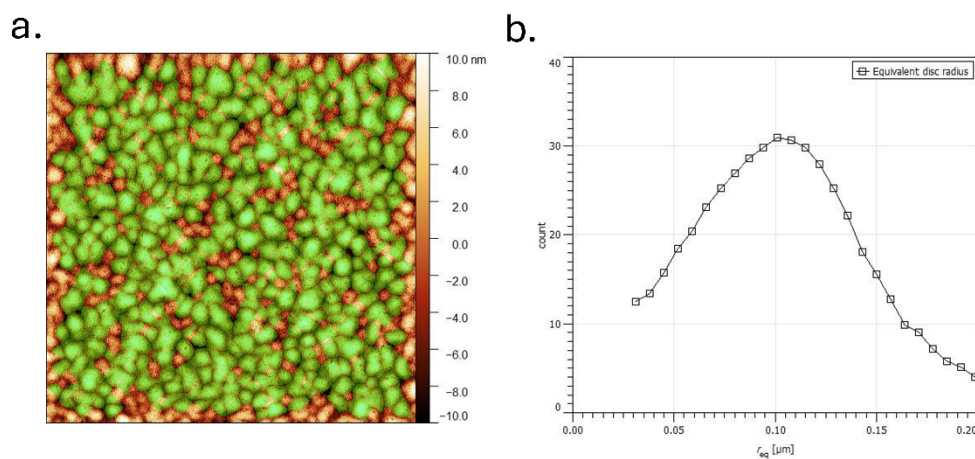

**Figure S3.** (Left): Example of granular domain measurement from AFM micrographs for a DPP-DTT:PC71BM-CHCl<sub>3</sub> film. Lateral size is 5x5μm Individual domains were automatically outlined via the Gwyddion segmentation algorithm after a 7px Gaussian Smoothing. (Right): Equivalent disc radius from

several individual grains is plotted as equivalent disc radius values. The resulting size distribution is monomodal with a mode of  $\sim 100\text{nm}$ , corresponding to a mean grain diameter of  $\sim 200\text{nm}$ .

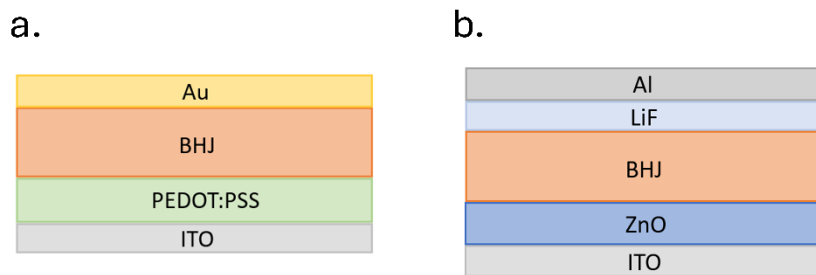

**Figure S4:** Schematic device structure of (a) HOD and (b) EOD device structures.

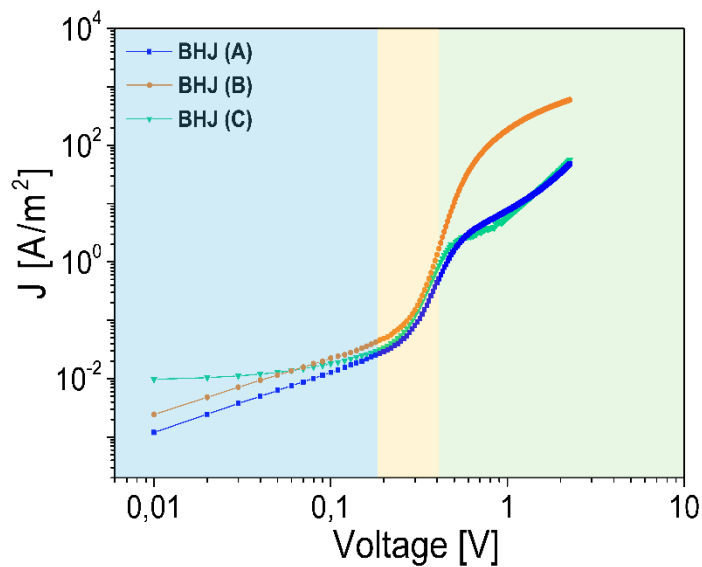

**Figure S5:** J-V curves of the hole-only devices with structure ITO/PEDOT:PSS/BHJ/Au in which the three typical charge-transport regions are clearly visible: (i) ohmic region ( $J \propto V$ ) highlighted in blue, (ii) trap-SCLC region ( $J \propto V^n$ ) region in yellow and (iii) SCLC region ( $J \propto V^2$ ) in green.

| BHJ | Annealing     | $\mu^{\text{SCLC}}_{\text{p}}$ [cm <sup>2</sup> /Vs]<br>@10V | $\mu^{\text{SCLC}}_{\text{n}}$ [cm <sup>2</sup> /Vs]<br>@10V |
|-----|---------------|--------------------------------------------------------------|--------------------------------------------------------------|
| (C) | 135°C for 10' | $3,4 \cdot 10^{-5}$                                          | $1,1 \cdot 10^{-6}$                                          |
| (C) | -             | $1,2 \cdot 10^{-5}$                                          | $7,3 \cdot 10^{-5}$                                          |

**Table S2** Performance parameters of the HODs and EODs fabricated with the BHJ based on DPP-DTT:PC<sub>61</sub>BM processed from the CHCl<sub>3</sub>:ODCB solvent mixtures, with and without annealing post-process on the BHJ. Each value has been extrapolated from measurements on 2 different devices.

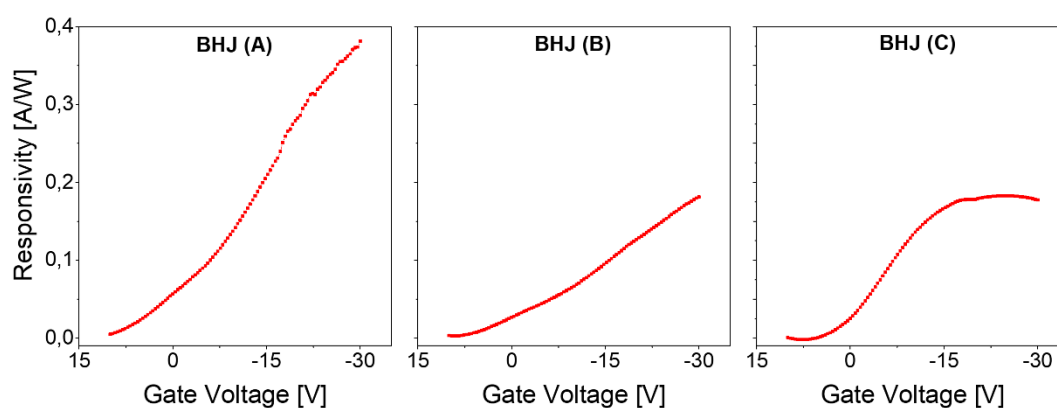

**Figure S6.** Light responsivity  $R$  as function of the applied gate voltage  $V_g$  of multilayer OPTs with BHJ photoactive layer (a) **(A)**, (b) **(B)** and (c) **(C)**.

The data supporting this article have been included as part of the Supplementary Information.

Multiple Output Curve of OPT fabricated with the BHJ based on DPP-DTT:PC<sub>61</sub>BM processed from the CHCl<sub>3</sub>

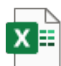

PC60-CF-moc p  
vd-20.csv

Multiple Output Curve of OPT fabricated with the BHJ based on DPP-DTT:PC<sub>71</sub>BM processed from the CHCl<sub>3</sub>

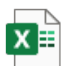

PC70-CF-moc p  
vd-20.csv
